# Supplementary material for: Electronic property modulation in two-dimensional lateral superlattices of monolayer transition metal dichalcogenides
Source: Royal Society of Chemistry journal article supplement (doi:10.1039/d2nr02189g), 2022-01-01
Supplement: d2nr02189g1.pdf [file d2nr02189g1.pdf]

## Supporting Information

### Electronic Property Modulation in Two-dimensional Lateral Superlattices of Monolayer Transition Metal Dichalcogenides

Hongshuai Zou <sup>a,+</sup>, Xinjiang wang <sup>b,+</sup>, Kun Zhou <sup>a</sup>, Yawen Li <sup>a</sup>, Yuhao Fu <sup>b\*</sup>,  
Lijun Zhang <sup>a\*</sup>

<sup>a</sup>State Key Laboratory of Integrated Optoelectronics, Key Laboratory of Automobile Materials of MOE and College of Materials Science and Engineering, Jilin University, Changchun 130012, China. E-mail: [lijun\\_zhang@jlu.edu.cn](mailto:lijun_zhang@jlu.edu.cn);

<sup>b</sup>State Key Laboratory of Superhard Materials, College of Physics, Jilin University, Changchun 130012, China. E-mail: [fuyuhaoy@gmail.com](mailto:fuyuhaoy@gmail.com)

+ These authors contributed equally

**Table S1.** Calculated lattice parameters, bond length, bandgap, and effective masses of electron and hole of MX<sub>2</sub> monolayers.

|                   | $a$ (Å)             |                      | $d$ (Å)             |                     | $E_g$ (eV)          |             | Effective mass ( $m_0$ ) |                                                                    |  |
|-------------------|---------------------|----------------------|---------------------|---------------------|---------------------|-------------|--------------------------|--------------------------------------------------------------------|--|
|                   | Cal.                | Exp.                 | Cal.                | Cal.                | Exp.                | y-direction | x-direction              | $m^*$                                                              |  |
| MoS <sub>2</sub>  | 3.18                | 3.16 <sup>[3]</sup>  | 2.417               | 1.68                | 2.4 <sup>[6]</sup>  | e: 0.48     | e: 0.48                  | e:0.37 <sup>[10]</sup> /0.44 <sup>[11]</sup> /0.65 <sup>[12]</sup> |  |
|                   | 3.18 <sup>[1]</sup> |                      | 2.41 <sup>[2]</sup> | 1.68 <sup>[5]</sup> |                     | h: 0.60     | h: 0.59                  | h:0.44 <sup>[10]</sup> /0.44 <sup>[11]</sup> /0.69 <sup>[12]</sup> |  |
| WS <sub>2</sub>   | 3.18                | 3.153 <sup>[4]</sup> | 2.416               | 1.82                | 2.73 <sup>[7]</sup> | e: 0.32     | e: 0.32                  | 0.40 <sup>[11]</sup> /0.75 <sup>[12]</sup>                         |  |
|                   | 3.18 <sup>[1]</sup> |                      | 2.41 <sup>[2]</sup> | 1.81 <sup>[1]</sup> |                     | h: 0.43     | h: 0.43                  | 0.43 <sup>[11]</sup> /0.57 <sup>[12]</sup>                         |  |
| MoSe <sub>2</sub> | 3.3                 | 3.288 <sup>[3]</sup> | 2.546               | 1.45                | 2.18 <sup>[8]</sup> | e: 0.56     | e: 0.56                  | 0.48 <sup>[11]</sup> /0.74 <sup>[12]</sup>                         |  |
|                   | 3.32 <sup>[1]</sup> |                      | 2.54 <sup>[2]</sup> | 1.44 <sup>[1]</sup> |                     | h: 0.68     | h: 0.66                  | 0.51 <sup>[11]</sup> /0.77 <sup>[12]</sup>                         |  |
| WSe <sub>2</sub>  | 3.32                | 3.28 <sup>[3]</sup>  | 2.546               | 1.55                | 2.12 <sup>[9]</sup> | e: 0.35     | e: 0.35                  | 0.36 <sup>[11]</sup> /0.48 <sup>[12]</sup>                         |  |
|                   | 3.32 <sup>[2]</sup> |                      | 2.55 <sup>[2]</sup> | 1.54 <sup>[5]</sup> |                     | h: 0.47     | h: 0.46                  | 0.39 <sup>[11]</sup> /0.62 <sup>[12]</sup>                         |  |

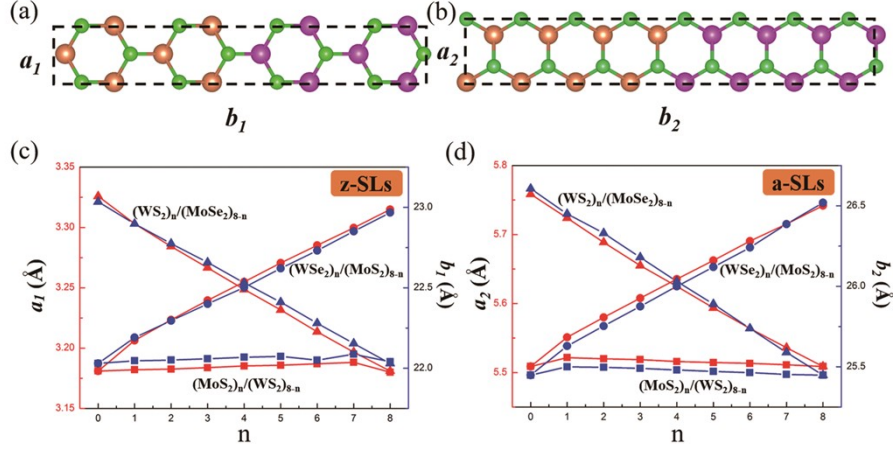

**Fig. S1** (a,b) Schematic diagram of z- and a-SLs, respectively. (c,d) Lattice parameters evolution with compositions in 2D lateral TMD-HSs. The  $a_1$ ,  $b_1$ ,  $a_2$  and  $b_2$  represent the corresponding lattice parameters in (a,b).

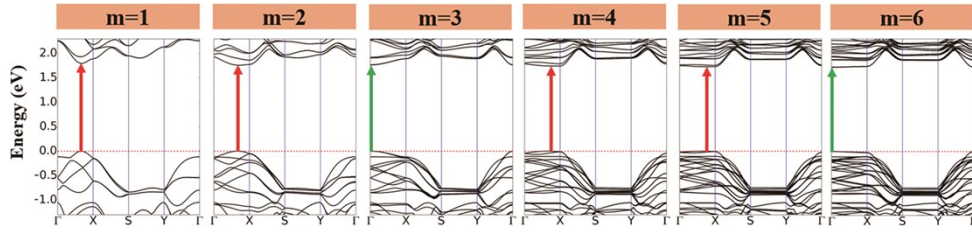

**Fig. S2** Calculated band structures of lateral a-(MoS<sub>2</sub>)<sub>m</sub>/(WS<sub>2</sub>)<sub>m</sub> SLs.

**Table S2.** Detailed Bandgaps of all studied 2D lateral TMD-SLs and alloys.

| Heterostructures                    | Compositions                                                        | Bandgap (eV) |          |        | Effective mass (m <sub>0</sub> )                                                             |                                                                                              |                                                                                              |
|-------------------------------------|---------------------------------------------------------------------|--------------|----------|--------|----------------------------------------------------------------------------------------------|----------------------------------------------------------------------------------------------|----------------------------------------------------------------------------------------------|
|                                     |                                                                     | zigzag       | armchair | alloy  | zigzag                                                                                       | armchair                                                                                     | alloy                                                                                        |
| MoS <sub>2</sub> -WS <sub>2</sub>   | (MoS <sub>2</sub> ) <sub>1</sub> /(WS <sub>2</sub> ) <sub>7</sub>   | 1.7791       | 1.7580   | 1.7809 | x-m <sub>c</sub> /x-m <sub>v</sub> 0.46/0.52<br>y-m <sub>c</sub> /y-m <sub>v</sub> 0.36/0.45 | x-m <sub>c</sub> /x-m <sub>v</sub> 0.65/0.44<br>y-m <sub>c</sub> /y-m <sub>v</sub> 0.41/0.44 | x-m <sub>c</sub> /x-m <sub>v</sub> 0.35/0.43<br>y-m <sub>c</sub> /y-m <sub>v</sub> 0.35/0.43 |
|                                     | (MoS <sub>2</sub> ) <sub>2</sub> /(WS <sub>2</sub> ) <sub>6</sub>   | 1.7460       | 1.7220   | 1.7538 | 0.51/0.54<br>0.40/0.47                                                                       | 0.77/0.47<br>0.46/0.46                                                                       | 0.37/0.46<br>0.37/0.46                                                                       |
|                                     | (MoS <sub>2</sub> ) <sub>3</sub> /(WS <sub>2</sub> ) <sub>5</sub>   | 1.7185       | 1.7060   | 1.7349 | 0.53/0.56<br>0.43/0.51                                                                       | 0.51/0.48<br>0.46/0.48                                                                       | 0.39/0.47<br>0.39/0.47                                                                       |
|                                     | (MoS <sub>2</sub> ) <sub>4</sub> /(WS <sub>2</sub> ) <sub>4</sub>   | 1.7015       | 1.6822   | 1.7147 | 0.54/0.57<br>0.45/0.53                                                                       | 0.61/0.53<br>0.47/0.50                                                                       | 0.41/0.49<br>0.42/0.50                                                                       |
|                                     | (MoS <sub>2</sub> ) <sub>5</sub> /(WS <sub>2</sub> ) <sub>3</sub>   | 1.6910       | 1.6790   | 1.6992 | 0.54/0.59<br>0.46/0.54                                                                       | 0.51/0.55<br>0.48/0.52                                                                       | 0.42/0.51<br>0.42/0.51                                                                       |
|                                     | (MoS <sub>2</sub> ) <sub>6</sub> /(WS <sub>2</sub> ) <sub>2</sub>   | 1.6841       | 1.6750   | 1.6873 | 0.54/0.62<br>0.45/0.56                                                                       | 0.55/0.54<br>0.48/0.54                                                                       | 0.44/0.53<br>0.44/0.53                                                                       |
|                                     | (MoS <sub>2</sub> ) <sub>7</sub> /(WS <sub>2</sub> ) <sub>1</sub>   | 1.6794       | 1.6730   | 1.6770 | 0.54/0.64<br>0.47/0.58                                                                       | 0.61/0.57<br>0.48/0.57                                                                       | 0.45/0.55<br>0.45/0.56                                                                       |
|                                     | (MoS <sub>2</sub> ) <sub>1</sub> /(WS <sub>2</sub> ) <sub>1</sub>   | 1.7136       | 1.7254   |        | 0.45/0.54<br>0.42/0.52                                                                       | 0.43/0.52<br>0.41/0.50                                                                       |                                                                                              |
|                                     | (MoS <sub>2</sub> ) <sub>2</sub> /(WS <sub>2</sub> ) <sub>2</sub>   | 1.7137       | 1.7      |        | 0.42/0.49<br>0.42/0.50                                                                       | 0.46/0.50<br>0.43/0.50                                                                       |                                                                                              |
|                                     | (MoS <sub>2</sub> ) <sub>3</sub> /(WS <sub>2</sub> ) <sub>3</sub>   | 1.7094       | 1.6973   |        | 0.43/0.49<br>0.41/0.52                                                                       | 0.41/0.47<br>0.43/0.49                                                                       |                                                                                              |
|                                     | (MoS <sub>2</sub> ) <sub>5</sub> /(WS <sub>2</sub> ) <sub>5</sub>   | 1.6895       | 1.6724   |        | 0.51/0.54<br>0.42/0.55                                                                       | 0.70/0.50<br>0.48/0.48                                                                       |                                                                                              |
|                                     | (MoS <sub>2</sub> ) <sub>6</sub> /(WS <sub>2</sub> ) <sub>6</sub>   | 1.6797       | 1.6631   |        | 0.60/0.62<br>0.58/0.62                                                                       | 0.68/0.68<br>0.46/0.47                                                                       |                                                                                              |
| MoS <sub>2</sub> -MoSe <sub>2</sub> | (MoS <sub>2</sub> ) <sub>1</sub> /(MoSe <sub>2</sub> ) <sub>7</sub> | 1.4538       | 1.4560   | 1.4578 | 0.58/0.64<br>0.60/0.60                                                                       | 0.49/0.67<br>0.55/0.64                                                                       | 0.53/0.63<br>0.57/0.60                                                                       |
|                                     | (MoS <sub>2</sub> ) <sub>2</sub> /(MoSe <sub>2</sub> ) <sub>6</sub> | 1.4695       | 1.4720   | 1.4829 | 0.59/0.64<br>0.61/0.72                                                                       | 0.57/0.83<br>0.54/0.65                                                                       | 0.53/0.64<br>0.52/0.69                                                                       |
|                                     | (MoS <sub>2</sub> ) <sub>3</sub> /(MoSe <sub>2</sub> ) <sub>5</sub> | 1.4839       | 1.4828   | 1.5088 | 0.58/0.65                                                                                    | 0.68/0.68                                                                                    | 0.52/0.61                                                                                    |

|                                    |                                                                     |        |        |        |                        |                        |                        |
|------------------------------------|---------------------------------------------------------------------|--------|--------|--------|------------------------|------------------------|------------------------|
|                                    |                                                                     |        |        |        | 0.62/0.72              | 0.52/0.64              | 0.56/0.59              |
|                                    | (MoS <sub>2</sub> ) <sub>4</sub> /(MoSe <sub>2</sub> ) <sub>4</sub> | 1.5069 | 1.5029 | 1.5434 | 0.56/0.65<br>0.57/0.73 | 0.53/0.69<br>0.50/0.65 | 0.50/0.62<br>0.57/0.59 |
|                                    | (MoS <sub>2</sub> ) <sub>5</sub> /(MoSe <sub>2</sub> ) <sub>3</sub> | 1.5342 | 1.5330 | 1.5706 | 0.54/0.64<br>0.57/0.83 | 0.51/0.80<br>0.50/0.64 | 0.50/0.62<br>0.48/0.60 |
|                                    | (MoS <sub>2</sub> ) <sub>6</sub> /(MoSe <sub>2</sub> ) <sub>2</sub> | 1.5789 | 1.5740 | 1.6018 | 0.52/0.63<br>0.47/0.84 | 0.54/0.86<br>0.49/0.63 | 0.50/0.60<br>0.51/0.58 |
|                                    | (MoS <sub>2</sub> ) <sub>7</sub> /(MoSe <sub>2</sub> ) <sub>1</sub> | 1.6220 | 1.6270 | 1.6400 | 0.50/0.60<br>0.51/0.64 | 0.46/0.71<br>0.48/0.60 | 0.47/0.59<br>0.47/0.57 |
|                                    | (MoS <sub>2</sub> ) <sub>1</sub> /(MoSe <sub>2</sub> ) <sub>1</sub> | 1.5149 | 1.5531 |        | 0.56/0.64<br>0.53/0.62 | 0.53/0.67<br>0.52/0.62 |                        |
|                                    | (MoS <sub>2</sub> ) <sub>2</sub> /(MoSe <sub>2</sub> ) <sub>2</sub> | 1.5340 | 1.5258 |        | 0.56/0.63<br>0.53/0.67 | 0.49/0.63<br>0.50/0.60 |                        |
|                                    | (MoS <sub>2</sub> ) <sub>3</sub> /(MoSe <sub>2</sub> ) <sub>3</sub> | 1.5156 | 1.5121 |        | 0.55/0.64<br>0.53/0.74 | 0.55/0.62<br>0.51/0.62 |                        |
|                                    | (MoS <sub>2</sub> ) <sub>5</sub> /(MoSe <sub>2</sub> ) <sub>5</sub> | 1.4833 | 1.4889 |        | 0.57/0.66<br>0.66/0.79 | 0.64/0.70<br>0.51/0.67 |                        |
|                                    | (MoS <sub>2</sub> ) <sub>6</sub> /(MoSe <sub>2</sub> ) <sub>6</sub> | 1.4613 | 1.4676 |        | 0.57/0.67<br>0.74/0.92 | 0.75/0.75<br>0.50/0.65 |                        |
| MoS <sub>2</sub> -WSe <sub>2</sub> | (MoS <sub>2</sub> ) <sub>1</sub> /(WSe <sub>2</sub> ) <sub>7</sub>  | 1.5298 | 1.5020 | 1.5400 | 0.46/0.56<br>0.45/0.49 | 0.82/0.49<br>0.43/0.49 | 0.39/0.47<br>0.39/0.47 |
|                                    | (MoS <sub>2</sub> ) <sub>2</sub> /(WSe <sub>2</sub> ) <sub>6</sub>  | 1.4955 | 1.4640 | 1.5556 | 0.51/0.58<br>0.45/0.55 | 0.83/0.57<br>0.48/0.51 | 0.41/0.49<br>0.47/0.50 |
|                                    | (MoS <sub>2</sub> ) <sub>3</sub> /(WSe <sub>2</sub> ) <sub>5</sub>  | 1.4847 | 1.4700 | 1.5599 | 0.52/0.60<br>0.46/0.61 | 0.64/0.68<br>0.49/0.52 | 0.43/0.51<br>0.43/0.51 |
|                                    | (MoS <sub>2</sub> ) <sub>4</sub> /(WSe <sub>2</sub> ) <sub>4</sub>  | 1.4953 | 1.4699 | 1.5757 | 0.51/0.63<br>0.53/0.68 | 0.69/0.70<br>0.47/0.55 | 0.47/0.52<br>0.44/0.54 |
|                                    | (MoS <sub>2</sub> ) <sub>5</sub> /(WSe <sub>2</sub> ) <sub>3</sub>  | 1.5176 | 1.4960 | 1.6030 | 0.50/0.66<br>0.50/0.72 | 0.63/0.74<br>0.48/0.57 | 0.48/0.54<br>0.44/0.55 |
|                                    | (MoS <sub>2</sub> ) <sub>6</sub> /(WSe <sub>2</sub> ) <sub>2</sub>  | 1.5628 | 1.5430 | 1.6208 | 0.49/0.69<br>0.51/0.70 | 0.54/0.76<br>0.48/0.61 | 0.46/0.56<br>0.54/0.56 |
|                                    | (MoS <sub>2</sub> ) <sub>7</sub> /(WSe <sub>2</sub> ) <sub>1</sub>  | 1.6326 | 1.6190 | 1.6460 | 0.48/0.69<br>0.48/0.63 | 0.52/0.68<br>0.47/0.64 | 0.46/0.57<br>0.49/0.58 |
|                                    | (MoS <sub>2</sub> ) <sub>1</sub> /(WSe <sub>2</sub> ) <sub>1</sub>  | 1.6116 | 1.6173 |        | 0.52/0.54<br>0.43/0.53 | 0.45/0.56<br>0.44/0.54 |                        |
|                                    | (MoS <sub>2</sub> ) <sub>2</sub> /(WSe <sub>2</sub> ) <sub>2</sub>  | 1.5477 | 1.5219 |        | 0.49/0.54<br>0.44/0.53 | 0.46/0.53<br>0.45/0.50 |                        |
|                                    | (MoS <sub>2</sub> ) <sub>3</sub> /(WSe <sub>2</sub> ) <sub>3</sub>  | 1.5222 | 1.5009 |        | 0.49/0.53<br>0.43/0.53 | 0.45/0.62<br>0.47/0.52 |                        |
|                                    | (MoS <sub>2</sub> ) <sub>5</sub> /(WSe <sub>2</sub> ) <sub>5</sub>  | 1.4557 | 1.4304 |        | 0.53/0.52<br>0.68/0.86 | 0.72/0.71<br>0.55/0.56 |                        |
|                                    | (MoS <sub>2</sub> ) <sub>6</sub> /(WSe <sub>2</sub> ) <sub>6</sub>  | 1.4193 | 1.3997 |        | 0.53/0.51<br>0.82/1.10 | 0.83/0.83<br>0.50/0.49 |                        |

|                                                                    |                                                                     |        |        |                        |                        |                        |                        |
|--------------------------------------------------------------------|---------------------------------------------------------------------|--------|--------|------------------------|------------------------|------------------------|------------------------|
| MoSe <sub>2</sub> -WS <sub>2</sub>                                 | (MoSe <sub>2</sub> ) <sub>1</sub> /(WS <sub>2</sub> ) <sub>7</sub>  | 1.7033 | 1.7200 | 1.7493                 | 0.32/0.43<br>0.32/0.43 | 0.44/0.45<br>0.43/0.43 | 0.34/0.43<br>0.35/0.48 |
|                                                                    | (MoSe <sub>2</sub> ) <sub>2</sub> /(WS <sub>2</sub> ) <sub>6</sub>  | 1.6773 | 1.6610 | 1.6848                 | 0.44/0.45<br>0.43/0.43 | 0.43/0.49<br>0.47/0.58 | 0.39/0.47<br>0.39/0.46 |
|                                                                    | (MoSe <sub>2</sub> ) <sub>3</sub> /(WS <sub>2</sub> ) <sub>5</sub>  | 1.6044 | 1.6190 | 1.6279                 | 0.42/0.53<br>0.47/0.50 | 0.42/0.53<br>0.47/0.50 | 0.42/0.50<br>0.43/0.50 |
|                                                                    | (MoSe <sub>2</sub> ) <sub>4</sub> /(WS <sub>2</sub> ) <sub>4</sub>  | 1.5808 | 1.5728 | 1.5750                 | 0.51/0.58<br>0.50/0.62 | 0.51/0.58<br>0.50/0.62 | 0.46/0.51<br>0.46/0.59 |
|                                                                    | (MoSe <sub>2</sub> ) <sub>5</sub> /(WS <sub>2</sub> ) <sub>3</sub>  | 1.5357 | 1.5400 | 1.5456                 | 0.46/0.58<br>0.46/0.62 | 0.46/0.58<br>0.46/0.62 | 0.47/0.56<br>0.50/0.55 |
|                                                                    | (MoSe <sub>2</sub> ) <sub>6</sub> /(WS <sub>2</sub> ) <sub>2</sub>  | 1.5102 | 1.5000 | 1.4925                 | 0.52/0.59<br>0.49/0.72 | 0.52/0.59<br>0.49/0.72 | 0.49/0.59<br>0.47/0.66 |
|                                                                    | (MoSe <sub>2</sub> ) <sub>7</sub> /(WS <sub>2</sub> ) <sub>1</sub>  | 1.4686 | 1.4690 | 1.4636                 | 0.54/0.61<br>0.60/0.60 | 0.54/0.61<br>0.60/0.60 | 0.51/0.62<br>0.52/0.68 |
|                                                                    | (MoSe <sub>2</sub> ) <sub>1</sub> /(WS <sub>2</sub> ) <sub>1</sub>  | 1.4804 | 1.5903 |                        | 0.46/0.54<br>0.45/0.53 | 0.48/0.55<br>0.47/0.52 |                        |
|                                                                    | (MoSe <sub>2</sub> ) <sub>2</sub> /(WS <sub>2</sub> ) <sub>2</sub>  | 1.5882 | 1.5757 |                        | 0.47/0.54<br>0.49/0.59 | 0.55/0.56<br>0.49/0.55 |                        |
|                                                                    | (MoSe <sub>2</sub> ) <sub>3</sub> /(WS <sub>2</sub> ) <sub>3</sub>  | 1.5683 | 1.5932 |                        | 0.51/0.54<br>0.47/0.60 | 0.52/0.56<br>0.47/0.55 |                        |
|                                                                    | (MoSe <sub>2</sub> ) <sub>5</sub> /(WS <sub>2</sub> ) <sub>5</sub>  | 1.5651 | 1.566  |                        | 0.56/0.55<br>0.53/0.66 | 0.88/0.68<br>0.52/0.56 |                        |
| (MoSe <sub>2</sub> ) <sub>6</sub> /(WS <sub>2</sub> ) <sub>6</sub> | 1.5647                                                              | 1.5659 |        | 0.61/0.57<br>0.60/0.69 | 0.93/0.72<br>0.50/0.58 |                        |                        |
| MoSe <sub>2</sub> -WSe <sub>2</sub>                                | (MoSe <sub>2</sub> ) <sub>1</sub> /(WSe <sub>2</sub> ) <sub>7</sub> | 1.5162 | 1.4996 | 1.5121                 | 0.41/0.47<br>0.44/0.48 | 0.81/0.43<br>0.42/0.46 | 0.38/0.46<br>0.40/0.48 |
|                                                                    | (MoSe <sub>2</sub> ) <sub>2</sub> /(WSe <sub>2</sub> ) <sub>6</sub> | 1.4891 | 1.4690 | 1.4944                 | 0.46/0.49<br>0.44/0.48 | 0.89/0.48<br>0.49/0.48 | 0.42/0.47<br>0.40/0.48 |
|                                                                    | (MoSe <sub>2</sub> ) <sub>3</sub> /(WSe <sub>2</sub> ) <sub>5</sub> | 1.4682 | 1.4591 | 1.4705                 | 0.49/0.50<br>0.48/0.54 | 0.51/0.53<br>0.49/0.50 | 0.45/0.52<br>0.46/0.60 |
|                                                                    | (MoSe <sub>2</sub> ) <sub>4</sub> /(WSe <sub>2</sub> ) <sub>4</sub> | 1.4545 | 1.4436 | 1.4610                 | 0.51/0.53<br>0.54/0.60 | 0.51/0.53<br>0.50/0.53 | 0.47/0.52<br>0.46/0.54 |
|                                                                    | (MoSe <sub>2</sub> ) <sub>5</sub> /(WSe <sub>2</sub> ) <sub>3</sub> | 1.4504 | 1.4421 | 1.4465                 | 0.50/0.55<br>0.54/0.60 | 0.56/0.60<br>0.52/0.54 | 0.47/0.55<br>0.51/0.60 |
|                                                                    | (MoSe <sub>2</sub> ) <sub>6</sub> /(WSe <sub>2</sub> ) <sub>2</sub> | 1.4503 | 1.4402 | 1.4441                 | 0.53/0.58<br>0.54/0.70 | 0.56/0.56<br>0.53/0.58 | 0.51/0.60<br>0.48/0.60 |
|                                                                    | (MoSe <sub>2</sub> ) <sub>7</sub> /(WSe <sub>2</sub> ) <sub>1</sub> | 1.4462 | 1.4410 | 1.4357                 | 0.53/0.61<br>0.54/0.60 | 0.72/0.56<br>0.54/0.61 | 0.51/0.59<br>0.48/0.54 |
|                                                                    | (MoSe <sub>2</sub> ) <sub>1</sub> /(WSe <sub>2</sub> ) <sub>1</sub> | 1.4633 | 1.4837 |                        | 0.45/0.54<br>0.48/0.57 | 0.48/0.55<br>0.47/0.53 |                        |
|                                                                    | (MoSe <sub>2</sub> ) <sub>2</sub> /(WSe <sub>2</sub> ) <sub>2</sub> | 1.4605 | 1.4468 |                        | 0.48/0.53<br>0.47/0.57 | 0.54/0.55<br>0.50/0.54 |                        |
|                                                                    | (MoSe <sub>2</sub> ) <sub>3</sub> /(WSe <sub>2</sub> ) <sub>3</sub> | 1.4628 | 1.4492 |                        | 0.49/0.53<br>0.45/0.57 | 0.50/0.50<br>0.49/0.53 |                        |

|                                   |                                                                     |        |        |        |                        |                        |                        |
|-----------------------------------|---------------------------------------------------------------------|--------|--------|--------|------------------------|------------------------|------------------------|
|                                   | (MoSe <sub>2</sub> ) <sub>5</sub> /(WSe <sub>2</sub> ) <sub>5</sub> | 1.4431 | 1.4254 |        | 0.52/0.52<br>0.57/0.63 | 0.64/0.58<br>0.59/0.56 |                        |
|                                   | (MoSe <sub>2</sub> ) <sub>6</sub> /(WSe <sub>2</sub> ) <sub>6</sub> | 1.4390 | 1.4182 |        | 0.54/0.52<br>0.65/0.69 | 0.81/0.76<br>0.53/0.51 |                        |
| WS <sub>2</sub> -WSe <sub>2</sub> | (WS <sub>2</sub> ) <sub>1</sub> /(WSe <sub>2</sub> ) <sub>7</sub>   | 1.5719 | 1.5721 | 1.5743 | 0.37/0.45<br>0.35/0.48 | 0.34/0.45<br>0.34/0.44 | 0.34/0.42<br>0.34/0.45 |
|                                   | (WS <sub>2</sub> ) <sub>2</sub> /(WSe <sub>2</sub> ) <sub>6</sub>   | 1.5976 | 1.5948 | 1.6034 | 0.36/0.45<br>0.35/0.45 | 0.32/0.47<br>0.34/0.44 | 0.34/0.43<br>0.34/0.41 |
|                                   | (WS <sub>2</sub> ) <sub>3</sub> /(WSe <sub>2</sub> ) <sub>5</sub>   | 1.6155 | 1.6150 | 1.6318 | 0.37/0.45<br>0.39/0.56 | 0.38/0.48<br>0.34/0.45 | 0.35/0.43<br>0.34/0.46 |
|                                   | (WS <sub>2</sub> ) <sub>4</sub> /(WSe <sub>2</sub> ) <sub>4</sub>   | 1.6464 | 1.6415 | 1.6714 | 0.35/0.45<br>0.34/0.50 | 0.32/0.45<br>0.33/0.45 | 0.33/0.43<br>0.34/0.42 |
|                                   | (WS <sub>2</sub> ) <sub>5</sub> /(WSe <sub>2</sub> ) <sub>3</sub>   | 1.6776 | 1.6742 | 1.7118 | 0.36/0.45<br>0.39/0.56 | 0.35/0.54<br>0.33/0.45 | 0.32/0.44<br>0.32/0.44 |
|                                   | (WS <sub>2</sub> ) <sub>6</sub> /(WSe <sub>2</sub> ) <sub>2</sub>   | 1.7275 | 1.7197 | 1.7410 | 0.34/0.45<br>0.39/0.56 | 0.32/0.52<br>0.33/0.44 | 0.32/0.42<br>0.33/0.45 |
|                                   | (WS <sub>2</sub> ) <sub>7</sub> /(WSe <sub>2</sub> ) <sub>1</sub>   | 1.7727 | 1.7724 | 1.7801 | 0.34/0.43<br>0.35/0.40 | 0.30/0.44<br>0.32/0.43 | 0.31/0.41<br>0.30/0.40 |
|                                   | (WS <sub>2</sub> ) <sub>1</sub> /(WSe <sub>2</sub> ) <sub>1</sub>   | 1.6165 | 1.6804 |        | 0.39/0.45<br>0.36/0.43 | 0.34/0.45<br>0.33/0.44 |                        |
|                                   | (WS <sub>2</sub> ) <sub>2</sub> /(WSe <sub>2</sub> ) <sub>2</sub>   | 1.67   | 1.6536 |        | 0.35/0.45<br>0.35/0.46 | 0.32/0.43<br>0.33/0.43 |                        |
|                                   | (WS <sub>2</sub> ) <sub>3</sub> /(WSe <sub>2</sub> ) <sub>3</sub>   | 1.6489 | 1.6454 |        | 0.37/0.45<br>0.35/0.47 | 0.32/0.45<br>0.33/0.45 |                        |
|                                   | (WS <sub>2</sub> ) <sub>5</sub> /(WSe <sub>2</sub> ) <sub>5</sub>   | 1.6286 | 1.6262 |        | 0.36/0.45<br>0.36/0.47 | 0.41/0.60<br>0.33/0.46 |                        |
|                                   | (WS <sub>2</sub> ) <sub>6</sub> /(WSe <sub>2</sub> ) <sub>6</sub>   | 1.6144 | 1.6038 |        | 0.36/0.46<br>0.43/0.68 | 0.42/0.59<br>0.33/0.45 |                        |

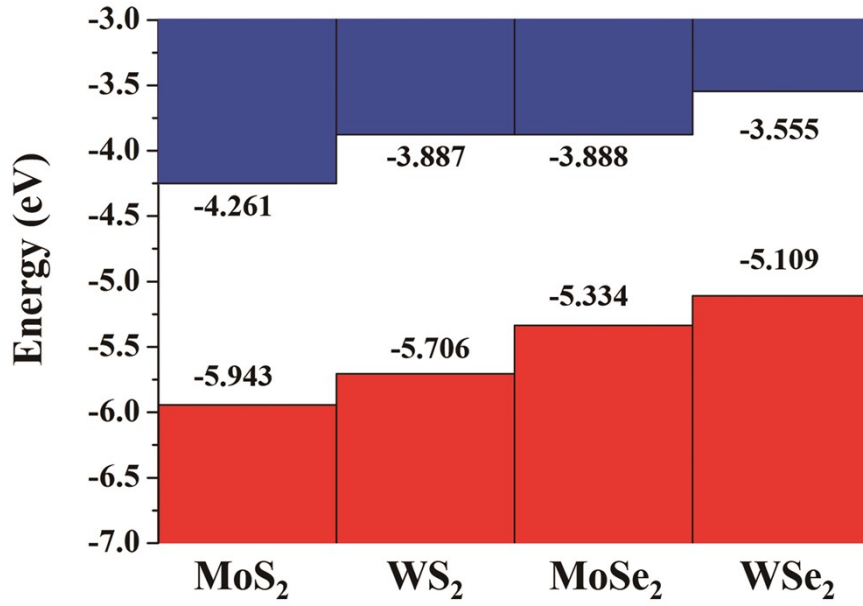

Fig. S3 Calculated band alignment of TMDs with PBE functional.

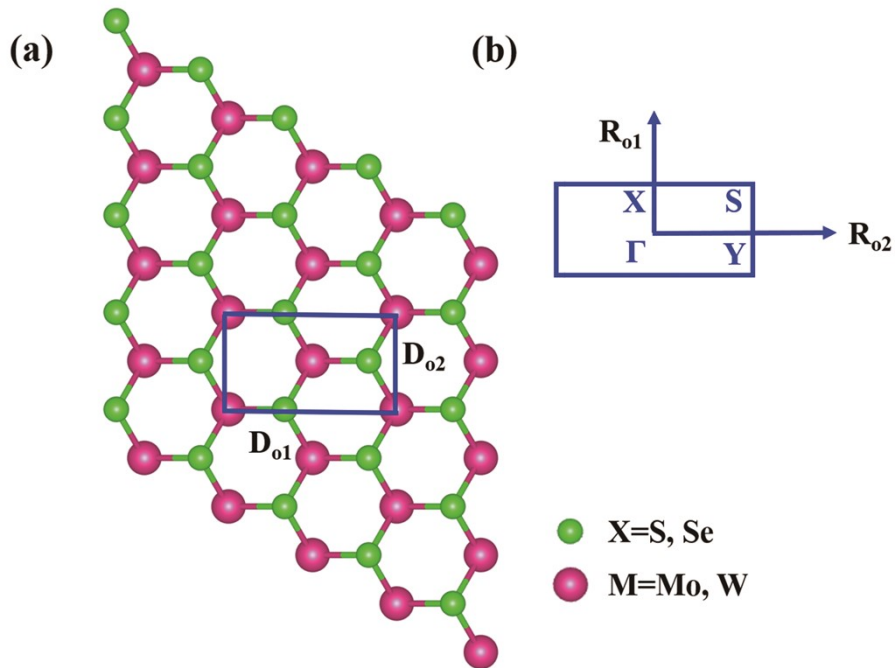

Fig. S4 (a) Atomic structure of monolayer MX<sub>2</sub>(M=Mo, W; X=S, Se), where the orthorhombic supercell (defined by D<sub>01</sub> and D<sub>02</sub>) is enclosed with blue frames. (b) The corresponding first Brillouin zones of the orthorhombic supercell. R<sub>01</sub>, R<sub>02</sub> represent the orthogonal axes of the orthorhombic cell.

**Table S3.** Calculated band-edge energy levels of lateral (MoS<sub>2</sub>)<sub>4</sub>/(WSe<sub>2</sub>)<sub>4</sub> SLs. The energy levels with strain-free from the band alignment calculations, without considering the lattice mismatch. Moreover, the bandgap is all listed. The red numbers represent the band-edge position of these SLs.

|             |          | MoS <sub>2</sub> | WSe <sub>2</sub> | Bandgap (eV) |
|-------------|----------|------------------|------------------|--------------|
| Strain-free | CBM (eV) | -4.261           | -3.555           | 0.848        |
|             | VBM (eV) | -5.943           | -5.109           |              |
| Zigzag      | CBM (eV) | -4.410           | -3.458           | 0.667        |
|             | VBM (eV) | -5.901           | -5.077           |              |
| Armchair    | CBM (eV) | -4.409           | -3.432           | 0.662        |
|             | VBM (eV) | -5.902           | -5.071           |              |

## References

1. W. Wei, Y. Dai, Q. Sun, N. Yin, S. Han, B. Huang and T. Jacob, *Physical Chemistry Chemical Physics*, 2015, **17**, 29380–29386.
2. J. Kang, S. Tongay, J. Zhou, J. Li and J. Wu, *Appl. Phys. Lett.*, 2013, **102**, 012111.
3. R. Coehoorn, C. Haas, J. Dijkstra, C. J. F. Flipse, R. A. de Groot and A. Wold, *Phys. Rev. B*, 1987, **35**, 6195–6202.
4. W. J. Schutte, J. L. De Boer and F. Jellinek, *Journal of Solid State Chemistry*, 1987, **70**, 207–209.
5. H. Wang, W. Wei, F. Li, B. Huang and Y. Dai, *Phys. Chem. Chem. Phys.*, 2018, **20**, 25000–25008.
6. Y. L. Huang, Y. Chen, W. Zhang, S. Y. Quek, C.-H. Chen, L.-J. Li, W.-T. Hsu, W.-H. Chang, Y. J. Zheng, W. Chen and A. T. S. Wee, *Nature Communications*, 2015, **6**, 6298.
7. B. Zhu, X. Chen and X. Cui, *Scientific Reports*, 2015, **5**, 9218.
8. M. M. Ugeda, A. J. Bradley, S.-F. Shi, F. H. da Jornada, Y. Zhang, D. Y. Qiu, W. Ruan, S.-K. Mo,



- Z. Hussain, Z.-X. Shen, F. Wang, S. G. Louie and M. F. Crommie, *Nature Materials*, 2014, **13**, 1091–1095.
9. C. Zhang, Y. Chen, A. Johnson, M.-Y. Li, L.-J. Li, P. C. Mende, R. M. Feenstra and C.-K. Shih, *Nano Lett.*, 2015, **15**, 6494–6500.
10. H. Peelaers and C. G. Van de Walle, *Phys. Rev. B*, 2012, **86**, 241401.
11. X. Yuan, M. Yang, L. Wang and Y. Li, *Physical Chemistry Chemical Physics*, 2017, **19**, 13846–13854..
12. Y. Sun, X. Wang, X.-G. Zhao, Z. Shi and L. Zhang, *Journal of Semiconductors*, 2018, **39**, 072001.
